# Supplementary material for: Sexual dysfunction worsen both the general and specific quality of life of women with irritable bowel syndrome. A cross-sectional study
Source: Research Square preprint supplement (doi:10.21203/rs.3.rs-2093102/v1), 2022-09-23
Supplement: Supplementary file 1 [file 46333f41ee39fdabdf36cc7b.pdf]

# Sexual dysfunction (SxD) worsens both the general and specific quality of life (QoL) of women with irritable bowel syndrome (IBS)

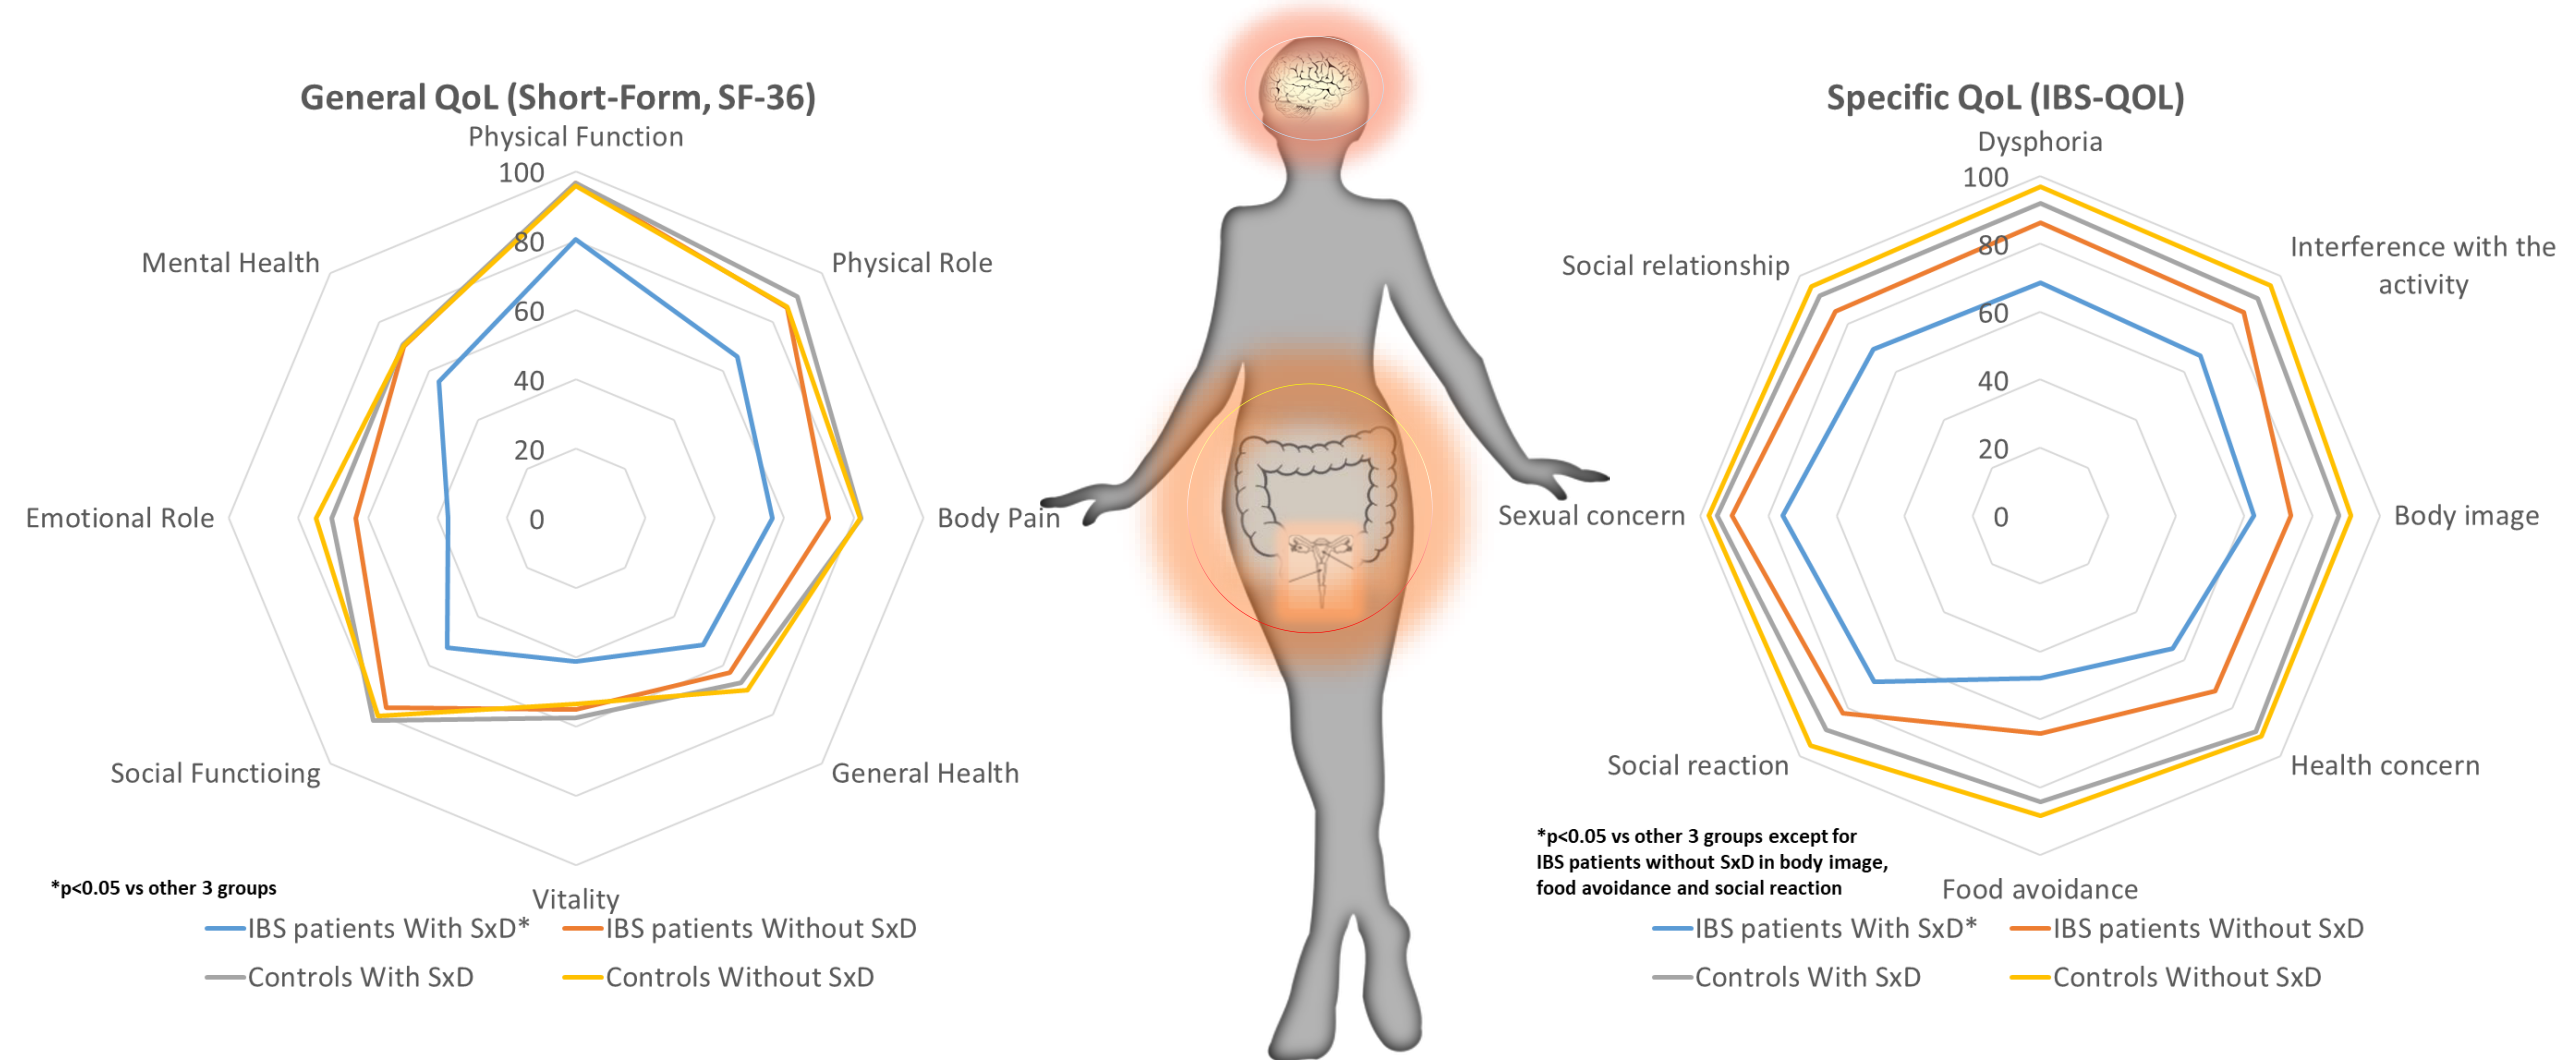

Diagnosis: IBS by **Rome IV** criteria and SxD by Female Sexual Function Index (FSFI)
